# Supplementary material for: Erbium energy bridging upconversion mechanism studies on BAKL:Er3+/Yb3+ glass-ceramics and simultaneous enhancement of color purity of the green luminescence
Source: Royal Society of Chemistry journal article supplement (doi:10.1039/d1dt03918k), 2022-01-01
Supplement: d1dt03918k1.pdf [file d1dt03918k1.pdf]

Electronic Supplementary Information:

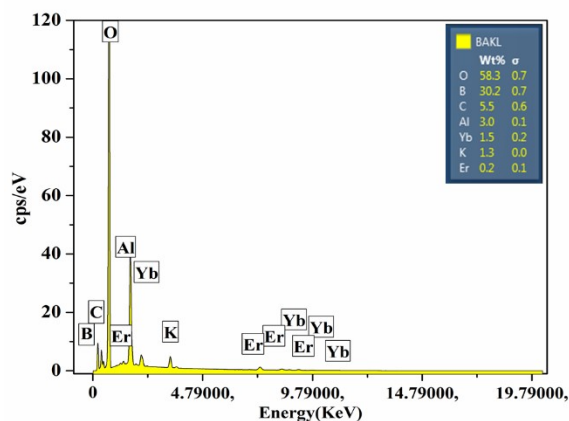

ESI 1: Electron Dispersion X-ray spectroscopy (EDX) of  $Er^{3+}/Yb^{3+}$  doped BAKL GCs.

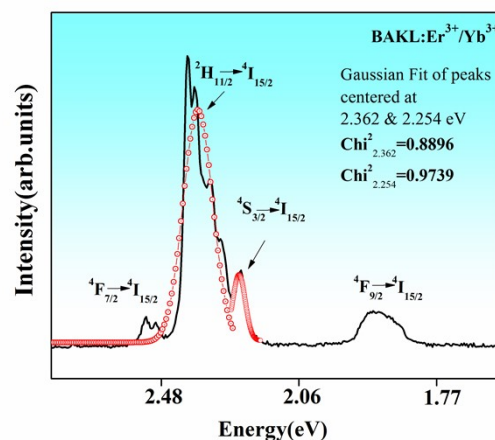

ESI 4: Gaussian fitted upconversion emission spectra of  $Er^{3+}/Yb^{3+}$  codoped BAKL GCs

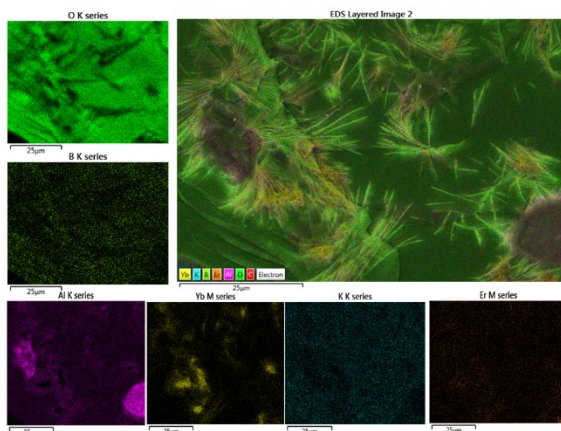

ESI 2: Elemental mapping through Electron Dispersion X-ray spectroscopy (EDX) of  $Er^{3+}/Yb^{3+}$  doped BAKL GCs.

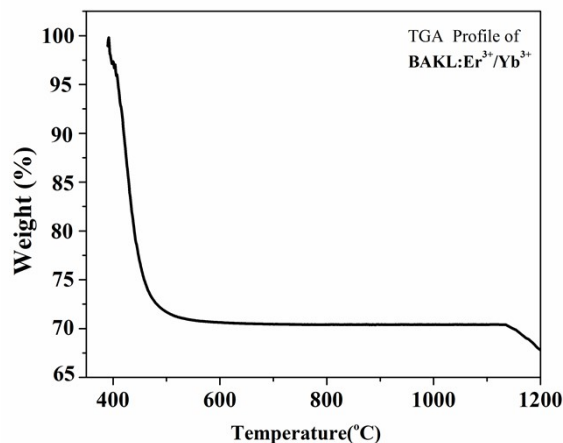

ESI 3: TGA trace profile of  $Er^{3+}/Yb^{3+}$  codoped BAKL GCs phosphor.
